# Supplementary material for: MFHAS1 Is Associated with Sepsis and Stimulates TLR2/NF-κB Signaling Pathway Following Negative Regulation
Source: PubMed Central journal article supplement (PMC4658032; doi:10.1371/journal.pone.0143662), 2015-11-24
Supplement: pone.0143662.s002.pdf [file pone.0143662.s002.pdf]

S1 Table. Primers used in this study.

| Genes              | Sequence (5'-3')        |
|--------------------|-------------------------|
| hIL6-F             | agtcctgatccagttcctgc    |
| hIL6-R             | aagctgcgcagaatgagatg    |
| hGAPDH-F           | acaacttgggtatcgtggaagg  |
| hGAPDH-R           | gccatcacgccacagttc      |
| hIFN- $\beta$ -F   | atgaccaacaagtgtctctcc   |
| hIFN- $\beta$ -R   | ggaatccaagcaagttgtagctc |
| mIL6-F             | ccggagaggagacttcacag    |
| mIL6-R             | ttctgcaagtgcacatcgt     |
| mMfhas1-F          | gagatcatctgccccaaagaa   |
| mMfhas1-R          | ttctgtgcttccaccaacg     |
| hMFHAS1-F          | gcctcatgctagacaacaacg   |
| hMFHAS1-R          | gctggttgcgactaaggtagag  |
| m $\beta$ -actin-F | tcctggagaagagctacga     |
| m $\beta$ -actin-R | agcactgtgtggcgtacag     |
